# Supplementary material for: G3BP–Caprin1–USP10 complexes mediate stress granule condensation and associate with 40S subunits
Source: PubMed Central journal article supplement — J Cell Biol. 2016 Mar 28;212(7):845–60. doi: 10.1083/jcb.201508028 (PMC4810302; doi:10.1083/jcb.201508028), 2016-03-28
Supplement: JCB_201508028_sm.pdf [file JCB_201508028_sm.pdf]

Kedersha et al., <http://www.jcb.org/cgi/content/full/jcb.201508028/DC1>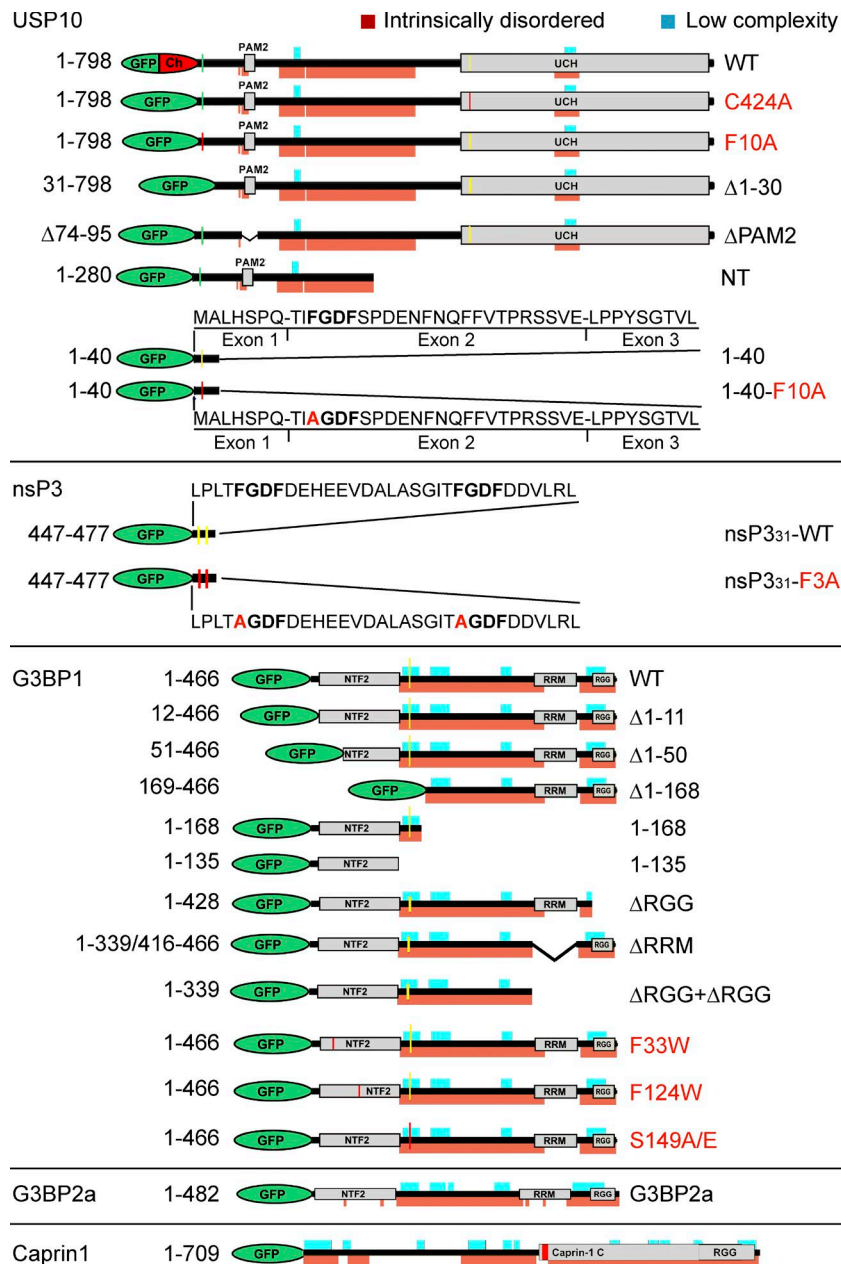

Figure S1. **Constructs used in this study.** Point mutants are indicated by red lines, and key residues are indicated by green or yellow lines. Gray boxes represent structured classical domains, and red areas indicate  $\geq 50\%$  predicted ID/IU regions, whereas aqua shading represent LC regions. aa residue numbers appear at the left.

**ΔG3BP1 gene**

G3BP1-WT           AGCAATGGTGATGGAGAAGCCTAGTCCCCTGCTGGTCGGGCGGGAATTTGTGAGACAGTATTACA  
ΔG3BP1 Allele 1   AGCAATGGTGATGGA-----GAGCAGTATTACA  
ΔG3BP1 Allele 2   AGCAATGTGA-----GACAGTATTACA

**ΔG3BP1 translated peptide**

G3BP1-WT           MVMEKPSPLLVGREFVRQYYTLLNQA-  
ΔG3BP1 Allele 1   MVMEAVLHTAEPGPRHAA\*  
ΔG3BP1 Allele 2   MVRQYYTLLNQAPDMLHRKSTGK\*

**ΔG3BP2 gene**

G3BP2-WT           AGAAATGGTTATGGAGAAGCCCAGTCCGCTGCTTGTAGGGCGGGAGTTTGTGAGGCAATA  
ΔG3BP2 Allele 1   AGAAATGGTTATGGAGAAGCCCA-----GTTTGTGAGGCAATA  
ΔG3BP2 Allele 2   AGAAATGGTTATGGAGAAGCCCAGTCCGCTGCTTGTAG-----GTTTGTGAGGCAATA

**ΔG3BP2 translated peptide**

G3BP2-WT           MVMEKPSPLLVGREFVRQYYTLLNKAP-  
ΔG3BP2 Allele 1   MVMEKPSL\*  
ΔG3BP2 Allele 2   MVMEKPSLLVCEAILYFAE\*

**ΔG3BP1+ΔG3BP2 gene**

G3BP2-WT           AGAAATGGTTATGGAGAAGCCCAGTCCGCTGCTTGTAG-GGCGGGAGTTTGTGAGGCAATA  
ΔG3BP2 Allele 1   AGAAATGGTTATGGAGAAGCCCAGTCCGCTGCTTGTAGGGCGGGAGTTTGTGAGGCAATA  
ΔG3BP2 Allele 2   AGAAATGGTTATGGAGAAGCCCAGTCCG-----AGTTTGTGAGGCAATA

**ΔG3BP1+ΔG3BP2 translated peptide**

G3BP2-WT           MVMEKPSPLLVGREFVRQYYTLLNKAP-  
ΔG3BP2 Allele 1   MVMEKPSLLVAGVCEAILYFAE\*  
ΔG3BP2 Allele 2   MVMEKPSPSL\*

Figure S2. **Genotype of ΔG3BP1, ΔG3BP2, and ΔΔG3BP1/2 cells.** Gene sequences showing Cas9-induced deletions; initiator ATG appears blue. Predicted protein products of native gene are aligned above the mutant alleles, with predicted frameshifted aa and premature stop codons (asterisks) shown in red. Note that the ΔΔG3BP1/2 cells were made from the ΔG3BP1 cells; hence, the G3BP1 deletion is the same in both cell lines.

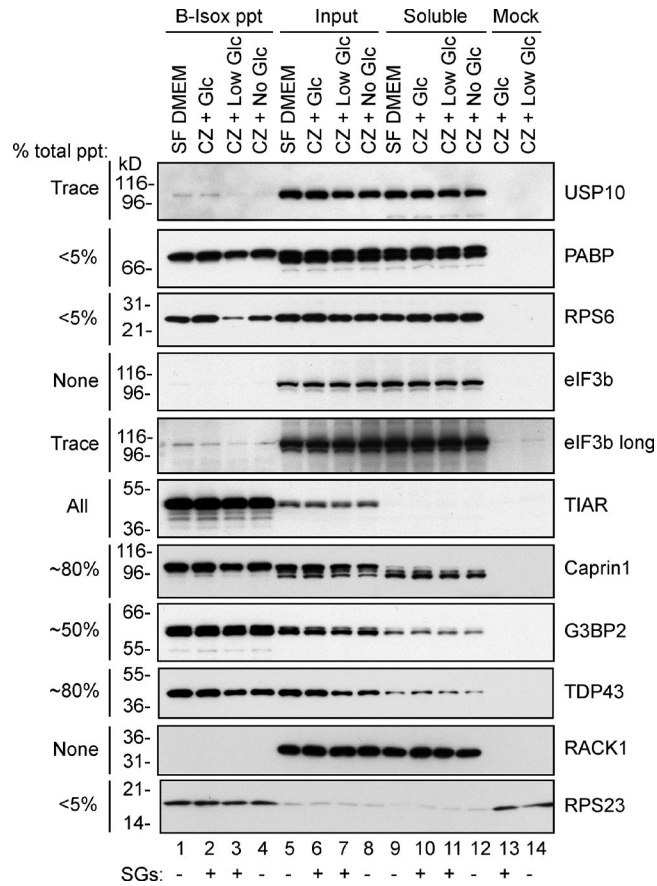

Figure S3. **B-isox solubility of different SG proteins with or without SG induction.** U2OS-WT cells, with or without SG-inducing treatment, were lysed in EE buffer and precipitated with B-isox. Insoluble (lanes 1–4), input (lanes 5–8), and soluble material (9–12) were subjected to Western blotting for the indicated proteins. “eIF3b long” indicates a long exposure. Values (soluble vs. input) were quantified by densitometry, and percent precipitated (ppt) was calculated. The presence of SGs induced by each treatment is indicated below. Treatments included serum-free media (lanes 1, 5, and 9) and 20  $\mu$ M CZ (lanes 2, 6, 10, and 13) in serum-free media; CZ in serum-free media containing reduced (0.1 mM) glucose (lanes 3, 7, 11, and 14) or CZ in glucose-free media (lanes 4, 8, and 12) to induce energy starvation. Mock precipitates using vehicle alone are in lanes 13 and 14.  $M_r$  (kD) are shown.

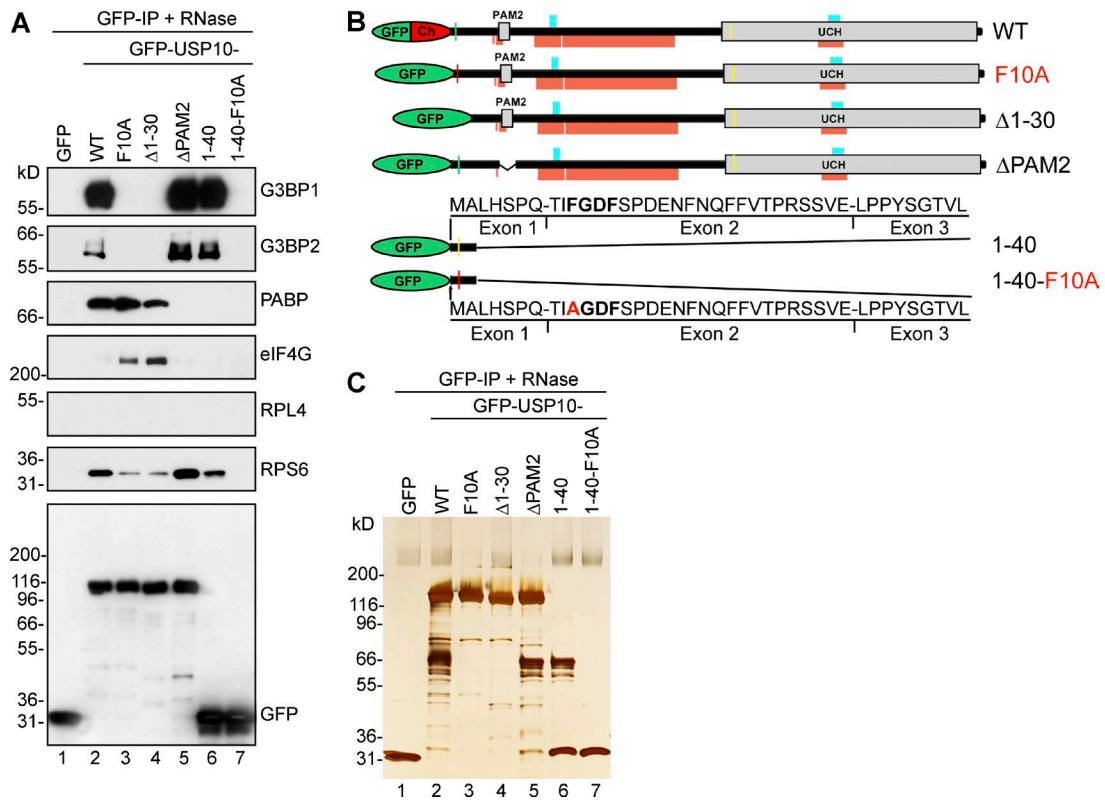

Figure S4. **USP10 mutants bind G3BP1/2 via the FGDF motif.** (A) IPs from transiently transfected COS7 cells prepared in EE buffer with RNase, resolved on SDS-PAGE, blotted and probed with as indicated.  $M_r$  (kD) are shown. (B) USP10 constructs depicted graphically. (C) Duplicate SDS-PAGE of A, silver stained.  $M_r$  (kD) are shown.

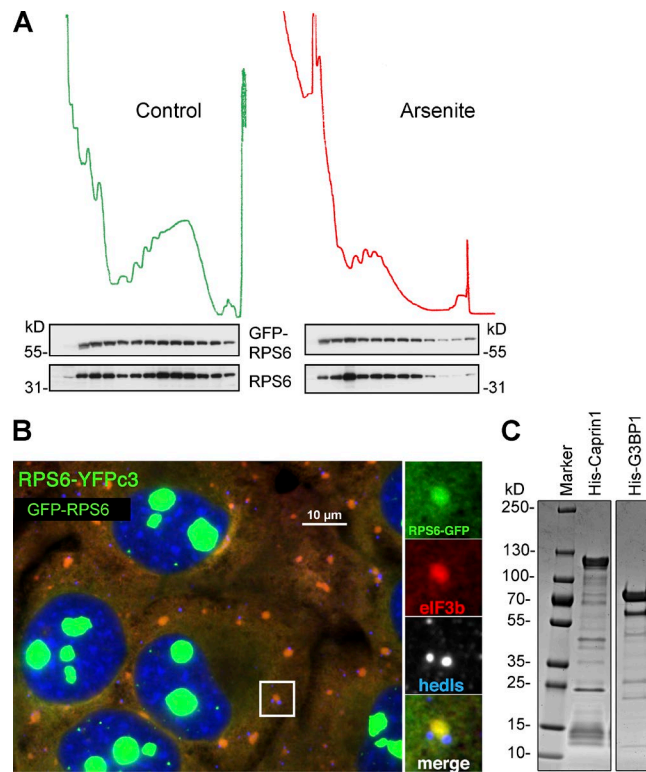

Figure S5. **Verification of RPS6 incorporated into 40S subunits and purity of His-Caprin1 and His-G3BP1.** (A) Polysome profiles from RPS6-GFP cells, with- out (green) or with (red) pretreatment with AS. RPS6-GFP migrates with endogenous RPS6 in both untreated and arsenite-treated cells. (B) AS-treated RPS6- GFP cells (green), stained for SGs (eIF3b, red) or P-bodies (Hedls, blue). Bar, 10  $\mu$ m. Insets zoomed 2.4 $\times$  with separated colors. (C) Coomassie staining of SDS-PAGE of purified recombinant His-Caprin1 and His-G3BP1.  $M_r$  (kD) are shown.

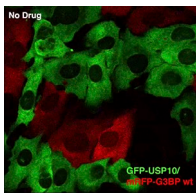

Video 1. **U2OS cells expressing GFP-USP10 resist AS-induced SG assembly.** U2OS cells stably expressing mRFP-G3BP (red) or GFP-USP10 (green), were cocultured for 24 h before image collection. Images were acquired using confocal microscopy (Z-stacks) at 1-min intervals and volume and time rendered. Cocultured cells monitored before and after addition of 100  $\mu$ M AS, as indicated in the video.

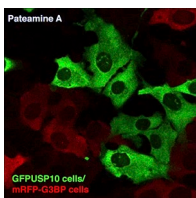

Video 2. **U2OS cells expressing GFP-USP10 resist Pat A-induced SG assembly.** U2OS cells stably expressing mRFP-G3BP (red) or GFP-USP10 (green), were cocultured for 24 h before image collection. Images were acquired using confocal microscopy (Z-stacks) at 1-min intervals and volume and time rendered. Cocultured cells monitored before and after addition of 50 nM Pat A, as indicated in the video.

Table S1. Oligos used in this study

| CRISPR/Cas 9 KO     | gDNA                                  | Sequence                                |
|---------------------|---------------------------------------|-----------------------------------------|
| G3BP1               | 1                                     | 5'-GGAGAAGCCTAGTCCCCTGC-3'              |
|                     | 2                                     | 5'-AAGCCTAGTCCCCTGCTGGT-3'              |
|                     | 3                                     | 5'-AGCCTAGTCCCCTGCTGGT-3'               |
|                     | 4                                     | 5'-CTAGTCCCCTGCTGGTGGG-3'               |
| G3BP2               | 1                                     | 5'-CGCCCTACAAGCAGCGGACT-3'              |
|                     | 3                                     | 5'-CCGCCCTACAAGCAGCGGAC-3'              |
| <b>siRNA KD</b>     | <b>Number</b>                         | <b>Sequence</b>                         |
| G3BP1               | 1                                     | 5'-UAACAGUGGUGGGAAUUA-3'                |
|                     | 2                                     | 5'-UGACAUGGAAGAACAUUUA-3'               |
|                     | 3                                     | 5'-GAAGGCGACCGACGAGUA-3'                |
|                     | 4                                     | 5'-GUGCGAGAACAACGAAUUA-3'               |
| G3BP2               | 1                                     | 5'-GAAUAAAGCUCCGGAAUUA-3'               |
|                     | 2                                     | 5'-GGAAGUACGUUUAAAUGUG-3'               |
|                     | 3                                     | 5'-UGAAGGAUCUGUCCAAAU-3'                |
|                     | 4                                     | 5'-GAUGAUCGACGGGAUUA-3'                 |
| USP10               | 1                                     | 5'-CCAUAAAGAUUGCAGAGUU-3'               |
|                     | 2                                     | 5'-CAAACAAGAGGUUGAGUA-3'                |
|                     | 3                                     | 5'-CCACAUUAUUUACAGACU-3'                |
|                     | 4                                     | 5'-GAGUUGCACACCACGGAAA-3'               |
| Caprin1             | 1                                     | 5'-AGGGUAAGCUUGAUGAUUA-3'               |
|                     | 2                                     | 5'-GCACGUCGGGAGCAGCUUA-3'               |
|                     | 3                                     | 5'-GGAAAUUGUUGAGCGUGUU-3'               |
|                     | 4                                     | 5'-UAGUCAGCCUACCAAGUA-3'                |
| Control (GFP)       |                                       | 5'-GGCTACGTCCAGGAGCGUA-3'               |
| <b>Plasmid</b>      | <b>Forward primer</b>                 | <b>Reverse primer</b>                   |
| GFP-USP10 F10A      | 5'-GCCGGAGATTTAGCCCTGATGAATC-3'       | 5'-AATATACTGCGGGCTGTGGAG-3'             |
| GFP-USP10 Δ1-30     | 5'-CTTCTCCATACAGTGGAACAG-3'           | 5'-AGCTCGAGATCTGAGTCCG-3'               |
| GFP-USP10 ΔPAM2     | 5'-GCTTCCAAAATAACCCCTGATG-3'          | 5'-GTAGCTGGGGTTCTCGG-3'                 |
| GFP-G3BP1 Δ1-11     | 5'-GGGCGGGAATTTGTGAGACA-3'            | 5'-AGATCTGAGTCCGGACTTGAC-3'             |
| GFP-G3BP1 Δ1-50     | 5'-GCAGATGCAGTCTACGGACA-3'            | 5'-AGATCTGAGTCCGGACTTGAC-3'             |
| GFP-G3BP1 1-135     | 5'-TAAGAATTCTGCAGTCGACGGTA-3'         | 5'-ATCTTGGTATCTGAAGATATCATTG-3'         |
| GFP-G3BP1 1-168     | 5'-TAATCAGCCATACCACATTTGTAG-3'        | 5'-ATCAGGTACCACCTCAGGTGT-3'             |
| GFP-G3BP1 169-466   | 5'-GATTCTGGAACITTTCTATGATCAG-3'       | 5'-CTTGTACAGCTCGTCCATGCC-3'             |
| GFP-G3BP1 ΔRRM      | 5Phos/5'-ACTGTCAGGGTGTCTACCATTCTTC-3' | 5Phos/5'-CGAGCTGCCAGGGAAGGC-3'          |
| GFP-G3BP1 ΔRGG      | 5Phos/5'-AAGGCGATTATCTCGTCGGTCGC-3'   | 5Phos/5'-TAAGAATTCTGCAGTCGACGGTACCGC-3' |
| GFP-G3BP1 ΔRRM+ΔRGG | 5Phos/5'-ACTGTCAGGGTGTCTACCATTCTTC-3' | 5Phos/5'-TAAGAATTCTGCAGTCGACGGTACCGC-3' |

Table S2. List of antibodies used in this study

| Antigen         | Species | Catalog number | Source                         |
|-----------------|---------|----------------|--------------------------------|
| Caprin1         | Rabbit  | 15112-1-AP     | Proteintech                    |
| Caprin1         | Rabbit  | HPA018126      | Sigma-Aldrich                  |
| eIF3b           | Goat    | sc-16377       | Santa Cruz Biotechnology, Inc. |
| eIF3f           | Rabbit  | A303-005A      | Bethyl Laboratories            |
| eIF4G           | Rabbit  | sc-11373       | Santa Cruz Biotechnology, Inc. |
| FMRP            | Mouse   | sc-101048      | Santa Cruz Biotechnology, Inc. |
| FXR1            | Goat    | sc-10554       | Santa Cruz Biotechnology, Inc. |
| G3BP1           | Mouse   | sc-81940       | Santa Cruz Biotechnology, Inc. |
| G3BP1           | Mouse   | 611126         | BD Transduction Labs           |
| G3BP1           | Rabbit  | A302-034A      | Bethyl Laboratories            |
| G3BP1           | Rabbit  | A302-033A      | Bethyl Laboratories            |
| G3BP2           | Rabbit  | A302-040A      | Bethyl Laboratories            |
| G3BP2           | Rabbit  | C18193         | Assay Biotechnology            |
| GFP             | Chicken | G160           | Abm                            |
| hedls/S6K       | Mouse   | sc-8418        | Santa Cruz Biotechnology, Inc. |
| P0              | Human   | HPO-0100       | Immunovision                   |
| PABP            | Mouse   | sc-32318       | Santa Cruz Biotechnology, Inc. |
| p-eIF2 $\alpha$ | Rabbit  | ab32157        | Abcam                          |
| Puromycin       | Mouse   | MABE343        | EMD Millipore                  |
| RACK1           | Mouse   | sc-17754       | Santa Cruz Biotechnology, Inc. |
| RPL4            | Rabbit  | 11302-1-AP     | Proteintech                    |
| RPL7A           | Rabbit  | 2403           | Cell Signaling                 |
| RPS23           | Mouse   | sc-100837      | Santa Cruz Biotechnology, Inc. |
| RPS6            | Mouse   | 2317S          | Cell Signaling                 |
| TDP43           | Rabbit  | 10782-2-AP     | Proteintech                    |
| TIA-1           | Goat    | sc-1751        | Santa Cruz Biotechnology, Inc. |
| TIAR            | Goat    | sc-1749        | Santa Cruz Biotechnology, Inc. |
| USP10           | Rabbit  | A300-900A      | Bethyl Laboratories            |
| USP10           | Rabbit  | A300-901A      | Bethyl Laboratories            |
| USP10           | Mouse   | ab119418       | Abcam                          |
